# Supplementary material for: Functional assessment of the “two-hit” model for neurodevelopmental defects in Drosophila and X. laevis
Source: PubMed Central journal article supplement (PMC8049494; doi:10.1371/journal.pgen.1009112), 2021-04-05

**A**

|                                   | Immune system process | Response to stimulus | Cuticle developemnt | Protein folding | Heat response | Metabolic process | Muscle contraction | Response to oxygen | Cell adhesion | Drug metabolism | Pigmentation | Respiratory system dev. |
|-----------------------------------|-----------------------|----------------------|---------------------|-----------------|---------------|-------------------|--------------------|--------------------|---------------|-----------------|--------------|-------------------------|
| <i>Cen</i> <sup>GD9689</sup>      |                       |                      |                     |                 |               |                   |                    |                    |               |                 |              |                         |
| <i>CG14182</i> <sup>GD2738</sup>  |                       |                      |                     |                 |               |                   |                    |                    |               |                 |              |                         |
| <i>Sin</i> <sup>GD7027</sup>      |                       |                      |                     |                 |               |                   |                    |                    |               |                 |              |                         |
| <i>UQCR-C2</i> <sup>GD11238</sup> |                       |                      |                     |                 |               |                   |                    |                    |               |                 |              |                         |

|                                   | Cellular respiration | Metabolic process | Proteolysis | Cell adhesion | Circulatory process | Drug metabolism | Immune system process | Response to stimulus | Signaling regulation | Synaptic assembly | Synaptic transmission | Vesicle transport | Cell differentiation | Homeostasis | Molecular transport | Muscle contraction | Nervous system dev. | Neuron proliferation | Sensory perception | Spindle organization | System/organ dev. | Protein folding |  |
|-----------------------------------|----------------------|-------------------|-------------|---------------|---------------------|-----------------|-----------------------|----------------------|----------------------|-------------------|-----------------------|-------------------|----------------------|-------------|---------------------|--------------------|---------------------|----------------------|--------------------|----------------------|-------------------|-----------------|--|
| <i>Cen</i> <sup>GD9689</sup>      |                      |                   |             |               |                     |                 |                       |                      |                      |                   |                       |                   |                      |             |                     |                    |                     |                      |                    |                      |                   |                 |  |
| <i>CG14182</i> <sup>GD2738</sup>  |                      |                   |             |               |                     |                 |                       |                      |                      |                   |                       |                   |                      |             |                     |                    |                     |                      |                    |                      |                   |                 |  |
| <i>Sin</i> <sup>GD7027</sup>      |                      |                   |             |               |                     |                 |                       |                      |                      |                   |                       |                   |                      |             |                     |                    |                     |                      |                    |                      |                   |                 |  |
| <i>UQCR-C2</i> <sup>GD11238</sup> |                      |                   |             |               |                     |                 |                       |                      |                      |                   |                       |                   |                      |             |                     |                    |                     |                      |                    |                      |                   |                 |  |

**B**

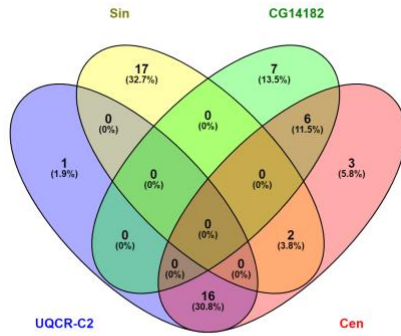

**C**

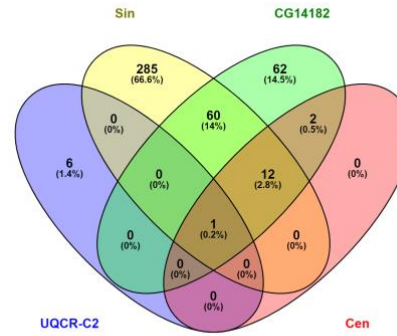

**D**

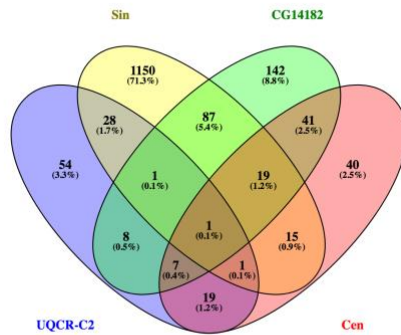

**E**

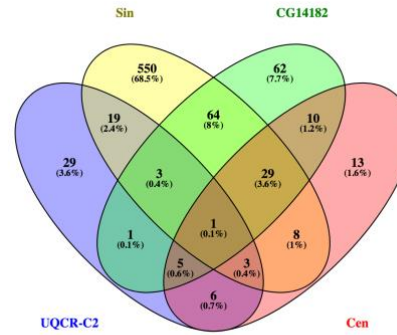

Supplement: pgen.1009112.s004.pdf [file pgen.1009112.s004.pdf]
