# Supplementary material for: Functional assessment of the “two-hit” model for neurodevelopmental defects in Drosophila and X. laevis
Source: PubMed Central journal article supplement (PMC8049494; doi:10.1371/journal.pgen.1009112), 2021-04-05

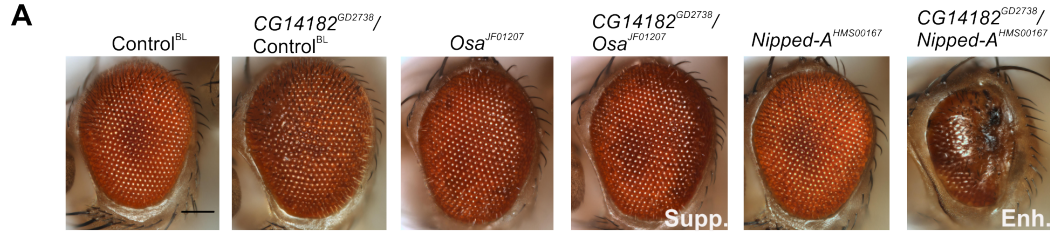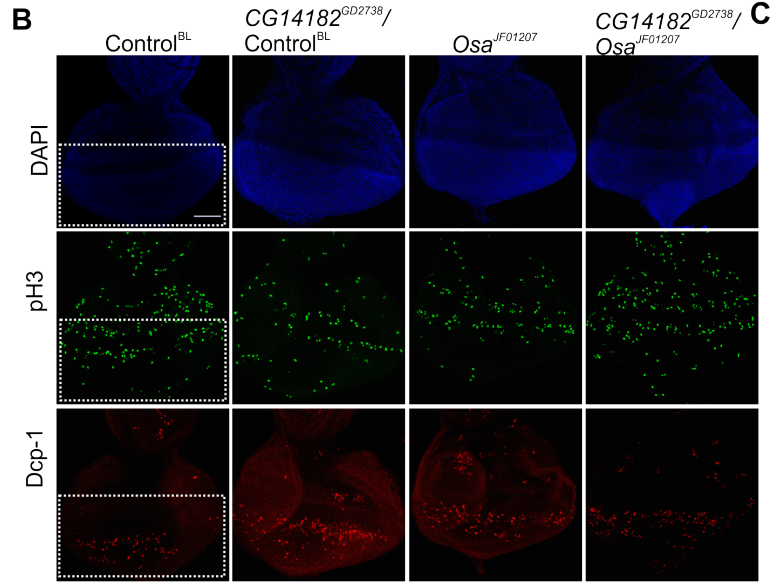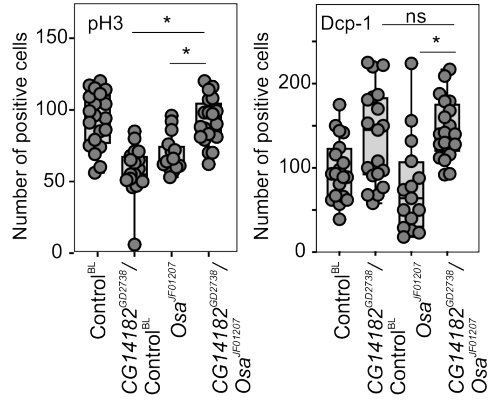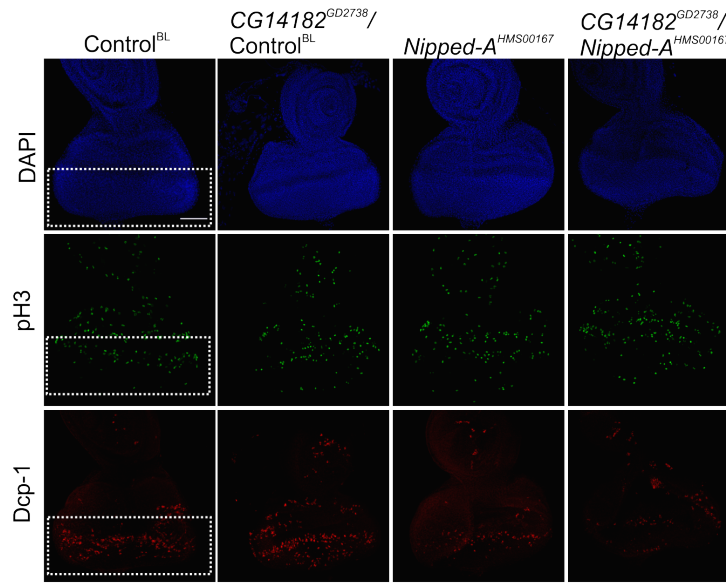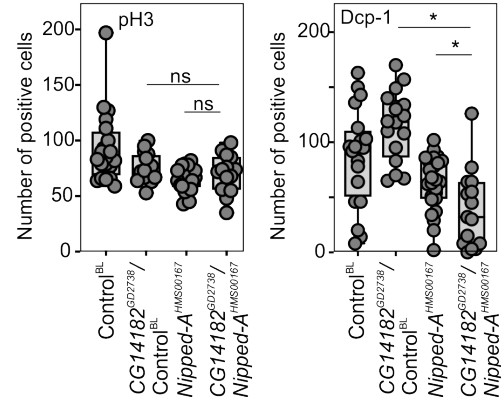

Supplement: pgen.1009112.s019.pdf [file pgen.1009112.s019.pdf]
