# Supplementary material for: Functional assessment of the “two-hit” model for neurodevelopmental defects in Drosophila and X. laevis
Source: PubMed Central journal article supplement (PMC8049494; doi:10.1371/journal.pgen.1009112), 2021-04-05

**A**Forebrain/midbrain area *polr3e/setd5*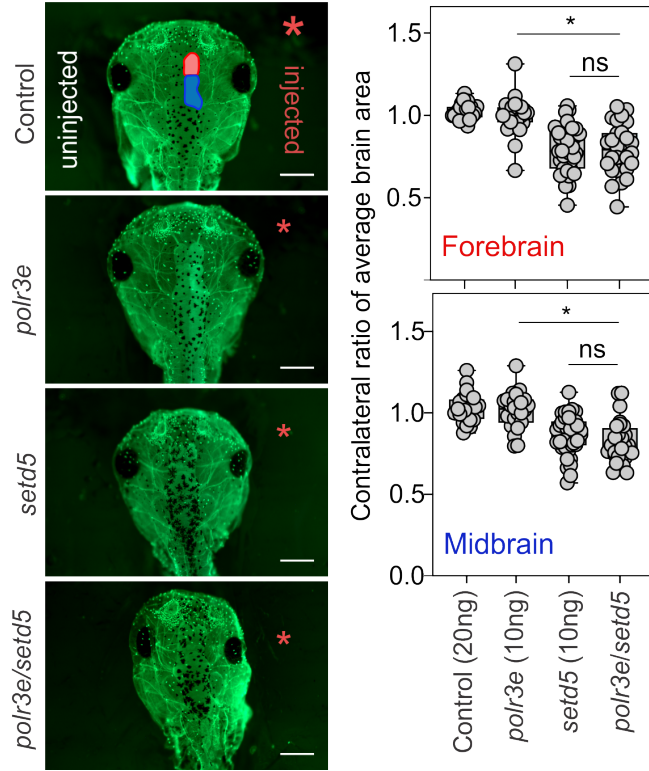**B**Axon length *mosmo/setd5*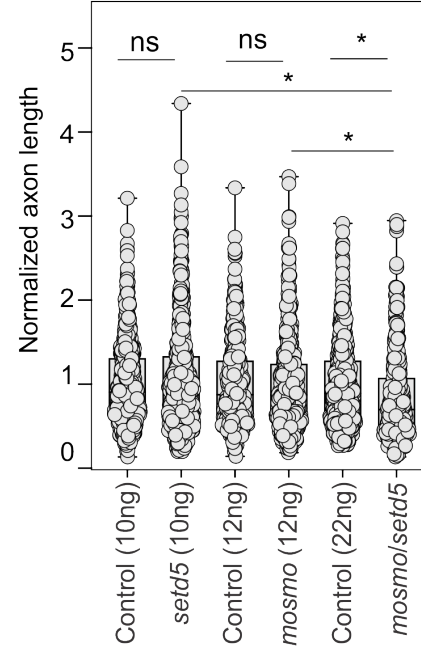**C**Axon length *polr3e/setd5*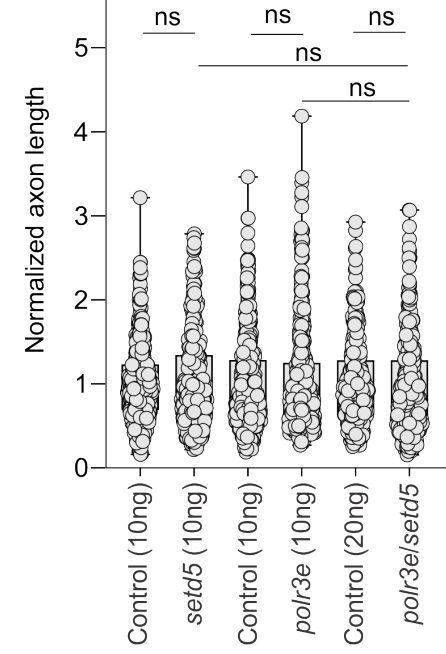

Supplement: pgen.1009112.s020.pdf [file pgen.1009112.s020.pdf]
