# Supplementary material for: Functional assessment of the “two-hit” model for neurodevelopmental defects in Drosophila and X. laevis
Source: PubMed Central journal article supplement (PMC8049494; doi:10.1371/journal.pgen.1009112), 2021-04-05
Supplement: pgen.1009112.s024.pdf [file pgen.1009112.s024.pdf]

| <b>HGNC symbol</b> | <b>Organism</b>   | <b>Homolog</b> | <b>% identity</b> | <b>DIOPT score</b> | <b>DIOPT rank</b> | <b>Larval central nervous system expression (FlyAtlas)</b> |
|--------------------|-------------------|----------------|-------------------|--------------------|-------------------|------------------------------------------------------------|
| <i>UQCRC2</i>      | <i>Drosophila</i> | <i>UQCR-C2</i> | 31%               | 13.82              | High              | Moderate                                                   |
| <i>CDR2</i>        | <i>Drosophila</i> | <i>Cen</i>     | 12%               | 8.93               | High              | Moderate                                                   |
| <i>MOSMO</i>       | <i>Drosophila</i> | <i>CG14182</i> | 51%               | 11.89              | High              | Low                                                        |
| <i>POLR3E</i>      | <i>Drosophila</i> | <i>Sin</i>     | 32%               | 12.83              | High              | Moderate                                                   |
| <i>EEF2K</i>       | <i>Drosophila</i> | NA             | NA                | NA                 | NA                | NA                                                         |
| <i>VWA3A</i>       | <i>Drosophila</i> | NA             | NA                | NA                 | NA                | NA                                                         |
| <i>PDZD9</i>       | <i>Drosophila</i> | NA             | NA                | NA                 | NA                | NA                                                         |
| <i>UQCRC2</i>      | <i>X. laevis</i>  | <i>uqcrc2</i>  | 70%               | ---                | ---               | ---                                                        |
| <i>CDR2</i>        | <i>X. laevis</i>  | <i>cdr2</i>    | 63%               | ---                | ---               | ---                                                        |
| <i>MOSMO</i>       | <i>X. laevis</i>  | <i>mosmo</i>   | 82%               | ---                | ---               | ---                                                        |
| <i>POLR3E</i>      | <i>X. laevis</i>  | <i>polr3e</i>  | 66%               | ---                | ---               | ---                                                        |
| <i>EEF2K</i>       | <i>X. laevis</i>  | <i>eef2k</i>   | 72%               | ---                | ---               | ---                                                        |
| <i>VWA3A</i>       | <i>X. laevis</i>  | <i>vwa3a</i>   | 51%               | ---                | ---               | ---                                                        |
| <i>PDZD9</i>       | <i>X. laevis</i>  | NA             | NA                | ---                | ---               | ---                                                        |
