# Supplementary material for: Functional assessment of the “two-hit” model for neurodevelopmental defects in Drosophila and X. laevis
Source: PubMed Central journal article supplement (PMC8049494; doi:10.1371/journal.pgen.1009112), 2021-04-05
Supplement: pgen.1009112.s025.pdf [file pgen.1009112.s025.pdf]

**Table S2A**

| <b>Genes modulating phenotypes of 16p12.1 homologs<sup>#</sup></b>                | <b>Total</b> | <b>16p12.1 homologs</b> | <b>Patient-specific "second-hit" genes</b> | <b>Neurodevel/ functionally related genes</b> | <b>Transcriptome targets</b> |
|-----------------------------------------------------------------------------------|--------------|-------------------------|--------------------------------------------|-----------------------------------------------|------------------------------|
| Total number of crosses                                                           | 521          | 39                      | 227                                        | 119                                           | 136                          |
| RNAi/mutant/overexp lines                                                         | 134          | 10                      | 46                                         | 24                                            | 54                           |
| Genes (fly homologs)                                                              | 80           | 4                       | 24                                         | 13                                            | 39                           |
| Tested pairwise combinations of RNAi lines                                        | 388          | 30                      | 181                                        | 95                                            | 82                           |
| Tested pairwise combinations of genes                                             | 224          | 12                      | 96                                         | 55                                            | 61                           |
| Pairwise combinations enhancing phenotypes due to knockdown of 16p12.1 homologs   | 54           | 3                       | 26                                         | 6                                             | 19                           |
| Pairwise combinations suppressing phenotypes due to knockdown of 16p12.1 homologs | 29           | 1                       | 6                                          | 12                                            | 10                           |
| Pairwise combinations that do not affect the phenotype of 16p12.1 homologs        | 76           | 3                       | 32                                         | 17                                            | 24                           |
| Pairwise combinations whose effects on 16p12.1 homologs were not validated        | 65           | 5                       | 32                                         | 20                                            | 8                            |

**Table S2B**

| <b>Interactions*</b>                            | <b>Total</b> | <b>16p12.1 homologs</b> | <b>Patient-specific "second-hit" genes</b> | <b>Neurodevel/ functionally related genes</b> | <b>Transcriptome targets</b> |
|-------------------------------------------------|--------------|-------------------------|--------------------------------------------|-----------------------------------------------|------------------------------|
| Negative interactions (confirmed and potential) | 41           | 0                       | 6                                          | 10                                            | 25                           |
| Positive interactions (confirmed and potential) | 63           | 3                       | 31                                         | 12                                            | 17                           |
| No interaction (confirmed and potential)        | 61           | 2                       | 30                                         | 18                                            | 11                           |
| Not validated interaction                       | 55           | 7                       | 29                                         | 12                                            | 7                            |

<sup>#</sup>Genes modulating phenotypes of 16p12.1 homologs were confirmed using Mann-Whitney tests.

\*Genetic interactions identified using the multiplicative model. Genes with no single knockdown *Flynotyper* phenotypes were excluded from multiplicative model testing.
