# Supplementary material for: Functional assessment of the “two-hit” model for neurodevelopmental defects in Drosophila and X. laevis
Source: PubMed Central journal article supplement (PMC8049494; doi:10.1371/journal.pgen.1009112), 2021-04-05
Supplement: pgen.1009112.s026.pdf [file pgen.1009112.s026.pdf]

| EXPERIMENT                   | Individual knockdown of 16p12.1 homologs                                                                                                                                                                                | Pairwise knockdown of 16p12.1 homologs                                                                                                                                                             | Pairwise interactions of 16p12.1 homologs with "Neurodevelopmental genes"                                                                                   | Pairwise interactions of 16p12.1 homologs with "Transcriptome targets"                                                                                          | Pairwise interactions of 16p12.1 homologs with "Patient-specific second-hit genes"                                                                   | Cellular phenotypes                                                                                                       |
|------------------------------|-------------------------------------------------------------------------------------------------------------------------------------------------------------------------------------------------------------------------|----------------------------------------------------------------------------------------------------------------------------------------------------------------------------------------------------|-------------------------------------------------------------------------------------------------------------------------------------------------------------|-----------------------------------------------------------------------------------------------------------------------------------------------------------------|------------------------------------------------------------------------------------------------------------------------------------------------------|---------------------------------------------------------------------------------------------------------------------------|
| <b>HYPOTHESIS TESTED</b>     | Multiple 16p12.1 homologs contribute to neurodevelopmental phenotypes                                                                                                                                                   | 16p12.1 homologs interact towards neurodevelopmental phenotypes                                                                                                                                    | 16p12.1 homologs interact with genes within core neurodevelopmental pathways and functionally related genes towards neurodevelopmental phenotypes           | 16p12.1 homologs interact with their downstream genes towards neurodevelopmental phenotypes                                                                     | Patient-specific "second-hits" can modulate neurodevelopmental phenotypes of 16p12.1 homologs through genetic interactions                           | Genes interact with 16p12.1 homologs towards neuronal defects by altering cellular phenotypes                             |
| <b>EXPERIMENTAL STRATEGY</b> | Individual knockdown of 16p12.1 homologs using tissue-specific drivers in <i>Drosophila</i> and whole-embryo knockdown in <i>X. laevis</i> , and assessment of multiple neuronal, cellular and developmental phenotypes | Simultaneous knockdown of 16p12.1 homologs - assessment of genetic interactions in the fly eye. Assessment of specific pairs of homologs towards brain and cellular phenotypes in <i>X. laevis</i> | Simultaneous knockdown of 16p12.1 homolog with neurodevelopmental genes and functionally related genes - assessment for genetic interactions in the fly eye | Simultaneous knockdown of 16p12.1 homolog with transcriptional targets or their functionally related genes - assessment for genetic interactions in the fly eye | Simultaneous knockdown of 16p12.1 homologs with homologs of patient-specific "second-hit" genes - assessment for genetic interactions in the fly eye | Assessment of cellular proliferation and apoptosis processes for validated two-hit interactions in the developing fly eye |
|                              |                                                                                                                                                                                                                         |                                                                                                                                                                                                    | Genes in established neurodevelopmental pathways - 7 genes; Genes functionally related to 16p12.1 homologs - 6 genes                                        | Up and down-regulated genes from transcriptome analysis of 16p12.1 homologs - 25 genes; Genes within enriched GO terms from transcriptome analysis - 14 genes   | Homologs of "second-hit" genes from sequencing children with 16p12.1 deletion - 24 genes                                                             |                                                                                                                           |
|                              |                                                                                                                                                                                                                         | 12 combinations                                                                                                                                                                                    | 55 combinations                                                                                                                                             | 61 combinations                                                                                                                                                 | 96 combinations                                                                                                                                      | 3 combinations                                                                                                            |
| <b>OUTCOME</b>               | Global and homolog-specific phenotypes                                                                                                                                                                                  | 3/12 positive interactions                                                                                                                                                                         | 22/55 interactions                                                                                                                                          | 42/61 interactions                                                                                                                                              | 37/96 interactions                                                                                                                                   | Alterations of proliferation and apoptosis processes compared to single knockdown of 16p12.1 homolog                      |

| <b>EXPERIMENT</b>                    | <b>Individual knockdown of 16p12.1 homologs</b>                                                                              | <b>Pairwise knockdown of 16p12.1 homologs</b>                                                                            | <b>Pairwise interactions of 16p12.1 homologs with "Neurodevelopmental genes"</b>                                                                                   | <b>Pairwise interactions of 16p12.1 homologs with "Transcriptome targets"</b>                       | <b>Pairwise interactions of 16p12.1 homologs with "Patient-specific second-hit genes"</b>                               | <b>Cellular phenotypes</b>                                                                                     |
|--------------------------------------|------------------------------------------------------------------------------------------------------------------------------|--------------------------------------------------------------------------------------------------------------------------|--------------------------------------------------------------------------------------------------------------------------------------------------------------------|-----------------------------------------------------------------------------------------------------|-------------------------------------------------------------------------------------------------------------------------|----------------------------------------------------------------------------------------------------------------|
| <b>CONCLUSIONS</b>                   | Each 16p12.1 homolog contributes towards a range of developmental, neuronal, and cellular defects in flies/ <i>X. laevis</i> | 16p12.1 homologs contribute towards neurodevelopmental phenotypes through mild genetic interactions and additive effects | 16p12.1 homologs interact with genes in core pathways towards neurodevelopmental phenotypes                                                                        | Differentially expressed genes interact with 16p12.1 homologs towards neurodevelopmental phenotypes | Patient-specific second-hits can modify phenotypes of 16p12.1 homologs through synergistic and alleviating interactions | Interacting genes modulate proliferation and apoptosis phenotypes of 16p12.1 homologs during development       |
| <b>HYPOTHESIS-GENERATING RESULTS</b> | Validation of phenotypes associated with each homologs in other model organisms                                              | Assessment of identified interactions in specific neuronal cell types                                                    | Follow up of identified interactions (such as those involving homologs of <i>MOSMO</i> and <i>SETD5</i> ) in other model organisms and human cell lines/organoids. |                                                                                                     |                                                                                                                         | Assessment of mechanisms connecting genes and interactions to cellular defects in specific neuronal cell types |
