# Supplementary material for: Functional assessment of the “two-hit” model for neurodevelopmental defects in Drosophila and X. laevis
Source: PubMed Central journal article supplement (PMC8049494; doi:10.1371/journal.pgen.1009112), 2021-04-05
Supplement: pgen.1009112.s027.pdf [file pgen.1009112.s027.pdf]

| Human gene     | Chr.  | Position  | Ref.     | Alt. | Variant Type         | Family | Phenotype change of 16p12.1 homologs                                        | Genetic interaction with 16p12.1 genes                                          |
|----------------|-------|-----------|----------|------|----------------------|--------|-----------------------------------------------------------------------------|---------------------------------------------------------------------------------|
| <i>SETD5</i>   | chr3  | 9488832   | T        | TAC  | Frameshift insertion | GL_01  | Enhancer <i>Sin</i> ;<br>Enhancer <i>CG14182</i>                            | Positive: <i>Cen</i><br>Negative: <i>CG14182</i>                                |
| <i>LAMC3</i>   | chr9  | 133927967 | C        | T    | Stopgain             | GL_01  | Enhancer <i>UQCR-C2</i>                                                     | Positive: <i>UQCR-C2</i> and <i>Sin</i>                                         |
| <i>DMD</i>     | chrX  | 33229421  | C        | T    | Stopgain             | GL_01  | No change/Not validated                                                     | Positive: <i>Sin</i>                                                            |
| <i>DPM1</i>    | chr20 | 49574926  | C        | T    | Stopgain             | GL_01  | No change/Not validated                                                     | No interaction/Not validated                                                    |
| <i>DNAH7</i>   | chr2  | 196759808 | A        | AT   | Stopgain             | GL_07  | No change/Not validated                                                     | No interaction/Not validated                                                    |
| <i>PDE11A</i>  | chr2  | 178879181 | G        | A    | Stopgain             | GL_07  | No change/Not validated                                                     | No interaction/Not validated                                                    |
| <i>CEP135</i>  | chr4  | 56877651  | CAG      | C    | Frameshift deletion  | GL_11  | Suppressor <i>UQCR-C2</i>                                                   | Negative: <i>Cen</i> and <i>Sin</i>                                             |
| <i>NRXN1</i>   | chr2  | 50837494  | NA       | NA   | Deletion             | GL_11  | Enhancer <i>UQCR-C2</i> and <i>Sin</i>                                      | Positive: <i>CG14182</i>                                                        |
| <i>PDLIM5</i>  | chr4  | 95575739  | A        | G    | Nonsynonymous        | GL_12  | Enhancer <i>Cen</i> , <i>CG14182</i>                                        | Positive: <i>UQCR-C2</i> and <i>Sin</i>                                         |
| <i>ARID1B</i>  | chr6  | 157099425 | A        | AGC  | Frameshift insertion | GL_13  | Suppressor <i>UQCR-C2</i> , <i>Cen</i> ,<br><i>CG14182</i> , and <i>Sin</i> | Positive:<br><i>Cen</i> and <i>CG14182</i>                                      |
| <i>PEX1</i>    | chr7  | 92123885  | GAGGAGCA | G    | Frameshift deletion  | GL_13  | Enhancer <i>Sin</i>                                                         | Positive: <i>CG14182</i>                                                        |
| <i>PYGM</i>    | chr11 | 64527223  | G        | A    | Stopgain             | GL_15  | No change/Not validated                                                     | Potential positive <i>UQCR-C2</i> ,<br><i>Cen</i> , <i>Sin</i> , <i>CG14182</i> |
| <i>DST</i>     | chr6  | 56480833  | G        | A    | Stopgain             | GL_19  | Enhancer <i>UQCR-C2</i> , <i>Cen</i> ,<br><i>Sin</i> , and <i>CG14182</i>   | Positive:<br><i>UQCR-C2</i> , <i>Cen</i> , <i>Sin</i>                           |
| <i>PSMD1</i>   | chr2  | 231949783 | T        | A    | Stopgain             | GL_19  | Enhancer <i>UQCR-C2</i> , <i>Sin</i> , and<br><i>CG14182</i>                | Potential positive: <i>UQCR-C2</i> ,<br><i>Sin</i>                              |
| <i>RAPGEF6</i> | chr5  | 130771676 | G        | A    | Stopgain             | GL_20  | Enhancer <i>UQCR-C2</i> , <i>Cen</i> ,<br><i>Sin</i> , and <i>CG14182</i>   | Positive:<br><i>UQCR-C2</i> , <i>CG14182</i>                                    |
| <i>NALCN</i>   | chr13 | 101763037 | G        | C    | Stopgain             | GL_22  | No change/Not validated                                                     | No interaction/Not validated                                                    |
| <i>CADPS</i>   | chr3  | 62739381  | C        | T    | Nonsynonymous        | GL_22  | Enhancer <i>Sin</i>                                                         | Positive: <i>UQCR-C2</i> and <i>Sin</i>                                         |
| <i>CAPN9</i>   | chr1  | 230895256 | A        | G    | Splicing             | GL_33  | Enhancer <i>UQCR-C2</i> and<br><i>CG14182</i>                               | Potential positive: <i>Sin</i>                                                  |

| Human gene     | Chr.  | Position  | Ref. | Alt. | Variant Type        | Family | Phenotype change of 16p12.1 homologs                                | Genetic interaction with 16p12.1 genes                                          |
|----------------|-------|-----------|------|------|---------------------|--------|---------------------------------------------------------------------|---------------------------------------------------------------------------------|
| <i>CHRNA7</i>  | chr15 | 30936285  | NA   | NA   | Deletion            | GL_36  | Enhancer <i>Cen</i>                                                 | Potential negative <i>Cen</i> , <i>Sin</i> , <i>CG14182</i>                     |
| <i>USP45</i>   | chr6  | 99891524  | C    | A    | Stopgain            | GL_46  | No change/Not validated                                             | Potential no interaction                                                        |
| <i>PDE11A</i>  | chr2  | 178681632 | CA   | C    | Frameshift deletion | GL_46  | No change/Not validated                                             | No interaction/Not validated                                                    |
| <i>DNAH10</i>  | chr12 | 124289588 | G    | C    | Splicing            | GL_48  | Enhancer <i>UQCR-C2</i> and <i>Sin</i> ,<br>Enhancer <i>CG14182</i> | Potential positive:<br><i>UQCR-C2</i> , <i>Cen</i> , <i>CG14182</i>             |
| <i>CACNA1A</i> | chr19 | 13342531  | G    | A    | Nonsynonymous       | GL_51  | Suppressor <i>CG14182</i>                                           | Potential positive <i>UQCR-C2</i> ,<br><i>Cen</i> , <i>Sin</i> , <i>CG14182</i> |
| <i>OPRL1</i>   | chr20 | 62729293  | GAC  | G    | Frameshift deletion | GL_52  | No change/Not validated                                             | No interaction/Not validated                                                    |
