# Supplementary material for: Functional assessment of the “two-hit” model for neurodevelopmental defects in Drosophila and X. laevis
Source: PubMed Central journal article supplement (PMC8049494; doi:10.1371/journal.pgen.1009112), 2021-04-05
Supplement: pgen.1009112.s028.pdf [file pgen.1009112.s028.pdf]

| Experiment                                |                                                     | Knockdown of <i>Drosophila</i> homologs of 16p12.1 genes |                                                         |                                                                          |                                                                                                            |
|-------------------------------------------|-----------------------------------------------------|----------------------------------------------------------|---------------------------------------------------------|--------------------------------------------------------------------------|------------------------------------------------------------------------------------------------------------|
| Phenotype                                 | Assay                                               | <i>UQCR-C2</i>                                           | <i>Cen</i>                                              | <i>Sin</i>                                                               | <i>CG14182</i>                                                                                             |
| Adult eye morphology                      | Eye phenotype (overexpression of <i>Dicer2</i> )    | Normal                                                   | Normal                                                  | Rough eye                                                                | Rough eye                                                                                                  |
|                                           | Eye phenotype (no overexpression of <i>Dicer2</i> ) | Normal                                                   | Normal                                                  | Moderate rough eye                                                       | Normal                                                                                                     |
| Role in development                       | Ubiquitous knockdown                                | Larval lethal                                            | Normal                                                  | Larval lethal                                                            | Normal                                                                                                     |
| Neuronal phenotypes                       | Wing development                                    | Lethal                                                   | Normal                                                  | Severe phenotype                                                         | Normal                                                                                                     |
|                                           | Lifespan                                            | Increased                                                | Normal                                                  | Reduced                                                                  | Reduced                                                                                                    |
|                                           | Developmental timing                                | Normal                                                   | Normal                                                  | Delayed / larval lethality                                               | Partial larval lethality                                                                                   |
|                                           | Seizure susceptibility                              | Increased                                                | Normal                                                  | Normal                                                                   | Normal                                                                                                     |
|                                           | Complexity of dendritic arbors                      | Normal                                                   | Normal                                                  | Normal                                                                   | Reduced                                                                                                    |
|                                           | Brain size                                          | Normal                                                   | Normal                                                  | Reduced                                                                  | Reduced                                                                                                    |
| Cellular proliferation (developing brain) | pH3 staining                                        | NA                                                       | NA                                                      | Reduced                                                                  | Reduced                                                                                                    |
| Apoptosis (developing brain)              | Dcp-1 staining                                      | NA                                                       | NA                                                      | Reduced                                                                  | Normal                                                                                                     |
| RNA sequencing (adult heads)              | Differential gene expression (fly homologs)         | Protein folding, heat shock                              | Protein folding, heat shock protein, muscle contraction | Cell adhesion, respiratory system development                            | No clear relevant functional enrichment                                                                    |
|                                           | Differential gene expression (human homologs)       | Protein folding                                          | Proteolysis                                             | Muscle contraction, nervous system development, system/organ development | Synapse assembly and transmission, histone methyltransferase function, small nucleolar ribonuclear complex |

| Experiment                                    |                              | Knockdown of <i>X. laevis</i> homologs of 16p12.1 genes |             |               |              |
|-----------------------------------------------|------------------------------|---------------------------------------------------------|-------------|---------------|--------------|
| Phenotype                                     | Assay                        | <i>uqrc2</i>                                            | <i>cdr2</i> | <i>polr3e</i> | <i>mosmo</i> |
| Craniofacial features                         | Face width                   | Normal                                                  | Decreased   | Decreased     | Decreased    |
|                                               | Face height                  | Normal                                                  | Increased   | Normal        | Increased    |
|                                               | Orofacial area               | Normal                                                  | Normal      | Decreased     | Decreased    |
|                                               | Eye area                     | Normal                                                  | Decreased   | Decreased     | Decreased    |
|                                               | Face angle                   | Normal                                                  | Decreased   | Decreased     | Decreased    |
| Brain phenotypes                              | Forebrain size (partial KD)  | Normal                                                  | Normal      | Normal        | Reduced      |
|                                               | Midbrain size (partial KD)   | Normal                                                  | Normal      | Normal        | Reduced      |
|                                               | Forebrain size (stronger KD) | Normal                                                  | Lethal      | Reduced       | Reduced      |
|                                               | Midbrain size (stronger KD)  | Normal                                                  | Lethal      | Reduced       | Reduced      |
| Axon outgrowth                                | Axon length (stronger KD)    | Normal                                                  | Lethal      | Normal        | Decreased    |
| Cellular proliferation<br>(developing embryo) | pH3 staining - western blot  | NA                                                      | NA          | Reduced       | Normal       |
