# Supplementary material for: Functional assessment of the “two-hit” model for neurodevelopmental defects in Drosophila and X. laevis
Source: PubMed Central journal article supplement (PMC8049494; doi:10.1371/journal.pgen.1009112), 2021-04-05
Supplement: pgen.1009112.s029.pdf [file pgen.1009112.s029.pdf]

| <b>Organism</b>        | <b>Human gene</b> | <b>Gene</b>    | <b>Primer name</b> | <b>Primer sequence (5'-3')</b> |
|------------------------|-------------------|----------------|--------------------|--------------------------------|
| <i>D. melanogaster</i> | <i>UQCRC2</i>     | <i>UQCR-C2</i> | UQCR-C2_Fwd1       | TCTGTCAAGGCTGTGAATGCC          |
| <i>D. melanogaster</i> |                   |                | UQCR-C2_Rev1       | AAAACCGAACAGACCAGCGT           |
| <i>D. melanogaster</i> | <i>CDR2</i>       | <i>Cen</i>     | Cen_Fwd1           | GCAGACGGACA ACTCCATCC          |
| <i>D. melanogaster</i> |                   |                | Cen_Rev1           | TCACCATGGGAGAGCCATTC           |
| <i>D. melanogaster</i> | <i>MOSMO</i>      | <i>CG14182</i> | CG14182_Fwd        | TCCCGACTGGATCATCACG            |
| <i>D. melanogaster</i> |                   |                | CG14182_Rev        | AGTCCCAATCGGATGTCACC           |
| <i>D. melanogaster</i> | <i>POLR3E</i>     | <i>Sin</i>     | Sin_Fwd1           | AAACGTGGCATCATGGACAA           |
| <i>D. melanogaster</i> |                   |                | Sin_Rev1           | GGTTATGGAACGCGAGCTTG           |
| <i>D. melanogaster</i> | <i>RP49</i>       | <i>Rp49</i>    | rp49_Fwd           | GCAAGCCCAAGGGTATCGA            |
| <i>D. melanogaster</i> |                   |                | rp49_Rev           | ACCGATGTTGGGCATCAGA            |
| <i>X. laevis</i>       | <i>MOSMO</i>      | <i>mosmo</i>   | MOSMO_Fwd_L_S      | CTTTGCCATCGCCAGTATCG           |
| <i>X. laevis</i>       |                   |                | MOSMO_Rev_L        | GGTAATTTGTAGGGTTGGCCTC         |
| <i>X. laevis</i>       |                   |                | MOSMO_Rev_S        | GGATGTTTGTCTTCTGGCAGC          |
| <i>X. laevis</i>       | <i>UQCRC2</i>     | <i>uqrc2</i>   | UQCRC2_Fwd_L       | CCGTGGAATTGAAGCTGTTG           |
| <i>X. laevis</i>       |                   |                | UQCRC2_Rev_L       | TAATCCAACCAGTGCCATCC           |
| <i>X. laevis</i>       |                   |                | UQCRC2_Fwd_S       | ATTACTCGCCCTCATCCAAG           |
| <i>X. laevis</i>       |                   |                | UQCRC2_Rev_S       | CAGTACAAGGAGTTAGCCAGTG         |
| <i>X. laevis</i>       | <i>POLR3E</i>     | <i>polr3e</i>  | POLR3E_Fwd_L       | GGAAAATGAAGATGACGATCC          |
| <i>X. laevis</i>       |                   |                | POLR3E_Rev_L       | GATGTGCCATCAACATTCAGG          |
| <i>X. laevis</i>       | <i>CDR2</i>       | <i>cdr2</i>    | CDR2_Fwd_L_S       | GACAGCAACGTGGAGGAGTTC          |
| <i>X. laevis</i>       |                   |                | CDR2_Rev_L_S       | TGCTCATTCATCCGACGCAG           |
| <i>X. laevis</i>       | <i>SETD5</i>      | <i>setd5</i>   | SETD5_Fwd_L_S      | ATCCCTCTGGGAGTCACCAC           |
| <i>X. laevis</i>       |                   |                | SETD5_Rev_L_S      | TGAGTGAATCCCATTTGTGCTCTG       |
| <i>X. laevis</i>       | <i>ODC1</i>       | <i>ODC1</i>    | ODC1_Fwd           | GCCATTGTGAAGACTCTCTCCATTC      |
| <i>X. laevis</i>       |                   |                | ODC1_Rev           | TTCGGGTGATTCTTGCCAC            |
