# Supplementary material for: Functional assessment of the “two-hit” model for neurodevelopmental defects in Drosophila and X. laevis
Source: PubMed Central journal article supplement (PMC8049494; doi:10.1371/journal.pgen.1009112), 2021-04-05
Supplement: pgen.1009112.s030.pdf [file pgen.1009112.s030.pdf]

---

| <b>Morpholino target</b>     | <b>Morpholino sequence</b>    |
|------------------------------|-------------------------------|
| <i>mosmo</i> L allele        | 5-ACAATTGACATCCACTTACTGCCGG-3 |
| <i>mosmo</i> S allele        | 5- CACCTTCCCTACCCCGCTACTTAC-3 |
| <i>polr3e</i> L allele       | 5-ACTGTAAGCCTCTTTTGCCTTACCT-3 |
| <i>uqcrc2</i> L allele       | 5-ACAGTGTCTCTAAAGCACAGATACA-3 |
| <i>uqcrc2</i> S allele       | 5-CCCCTAACCCATTAACATATACCT-3  |
| <i>cdr2</i> S and L alleles  | 5-CATCCCTCCCATACTCACCTTG-3    |
| <i>setd5</i> S and L alleles | 5-TGATTGAGGGCTGTAGAGGAGAAAA-3 |
| standard control morpholino  | 5-CCTCTTACCTCAGTTACAATTTATA-3 |

---
